# Supplementary material
Source: HighWire-hosted journal article supplement (https://erj.ersjournals.com/content/51/4/1701009)
Supplement: inline-supplementary-material-2 [file inline-supplementary-material-2.pdf]

# sFigure 1

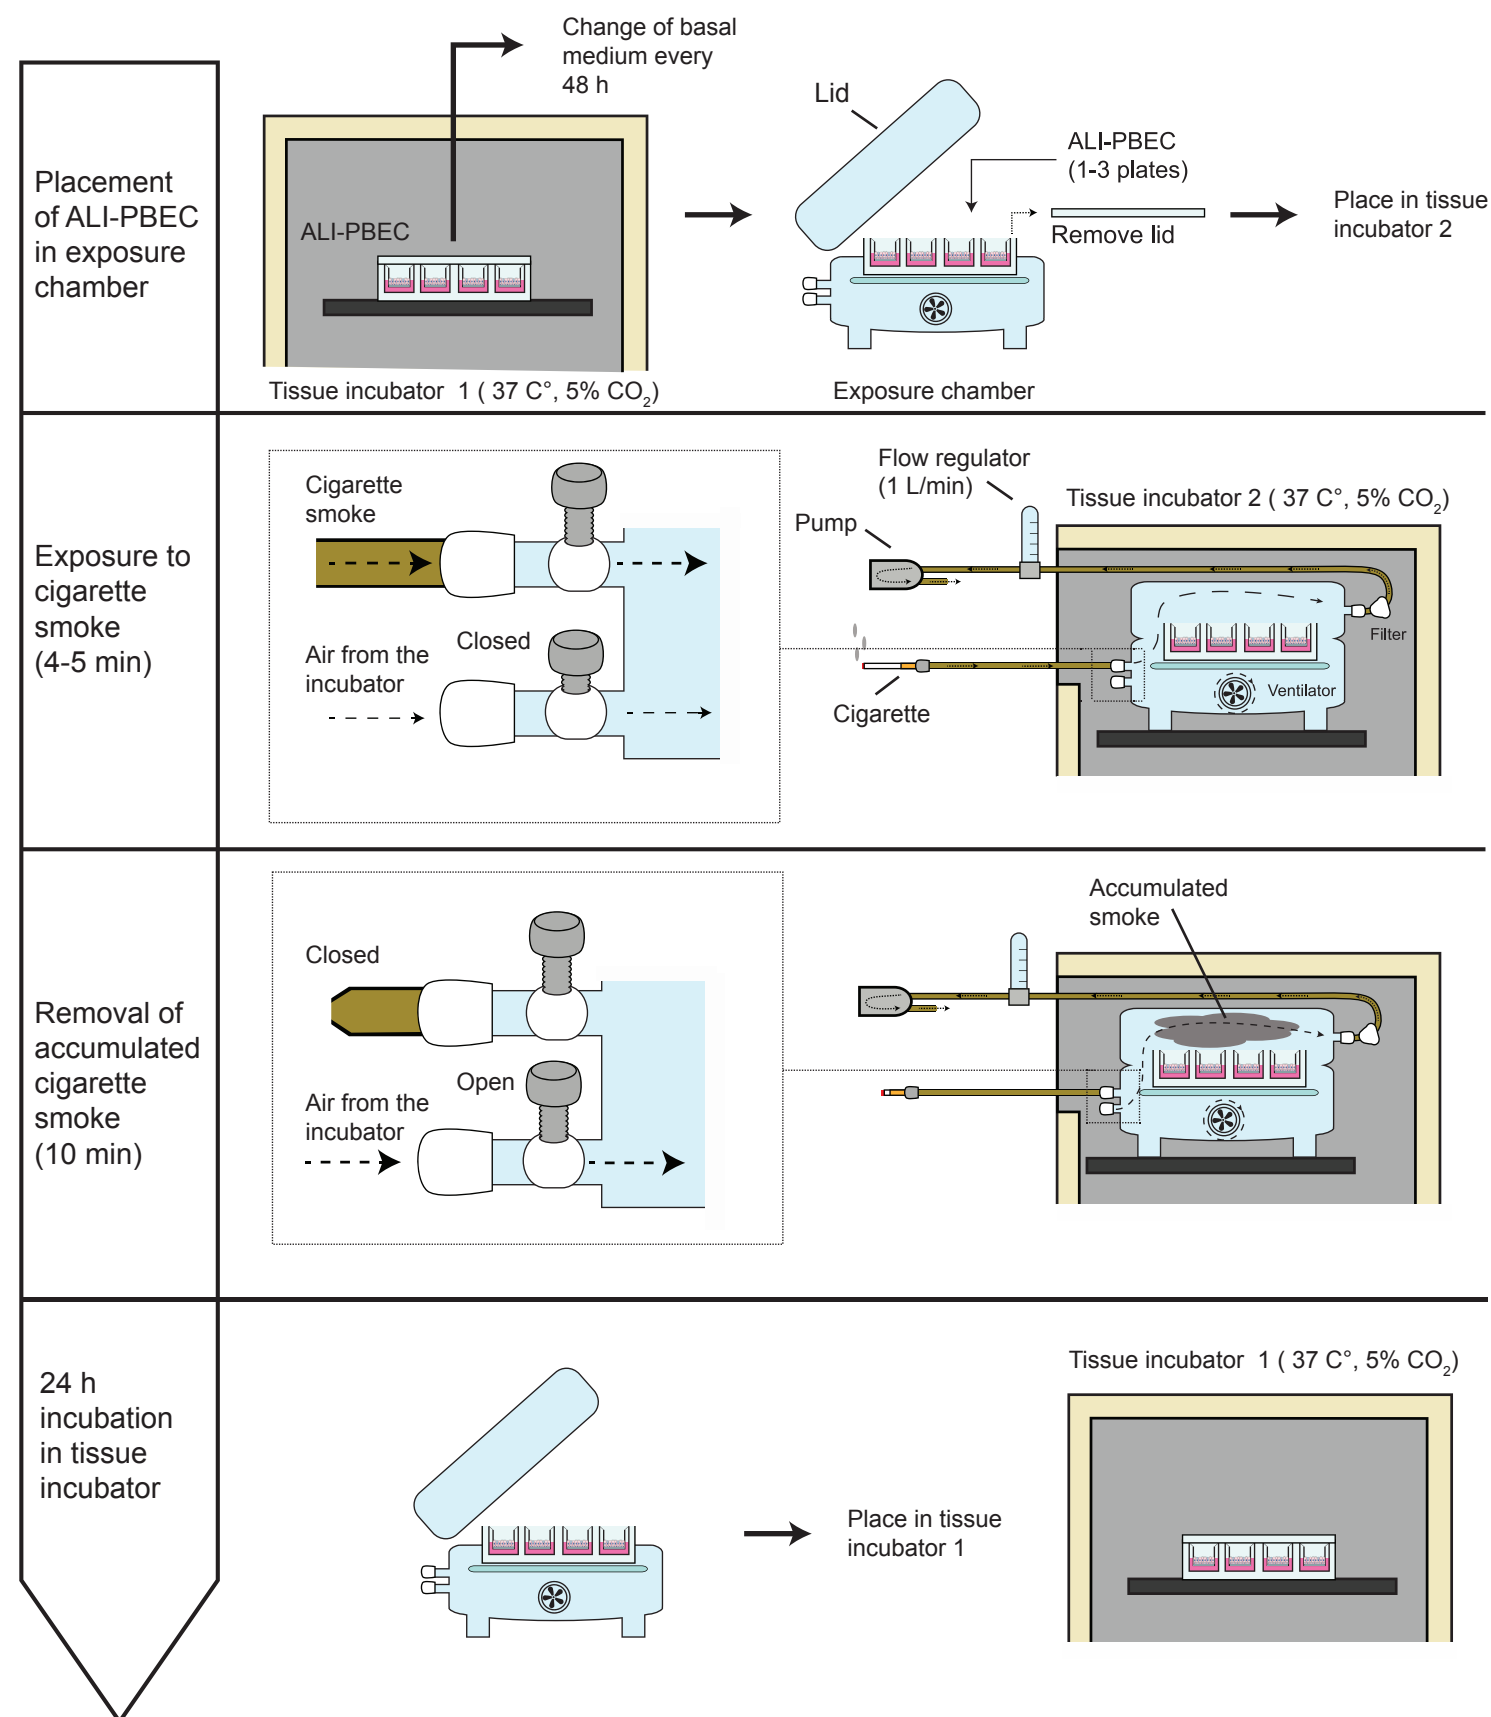

Procedure is repeated for 13-19 days
