# Supplementary material
Source: HighWire-hosted journal article supplement (https://erj.ersjournals.com/content/51/4/1701009)

sFigure 4

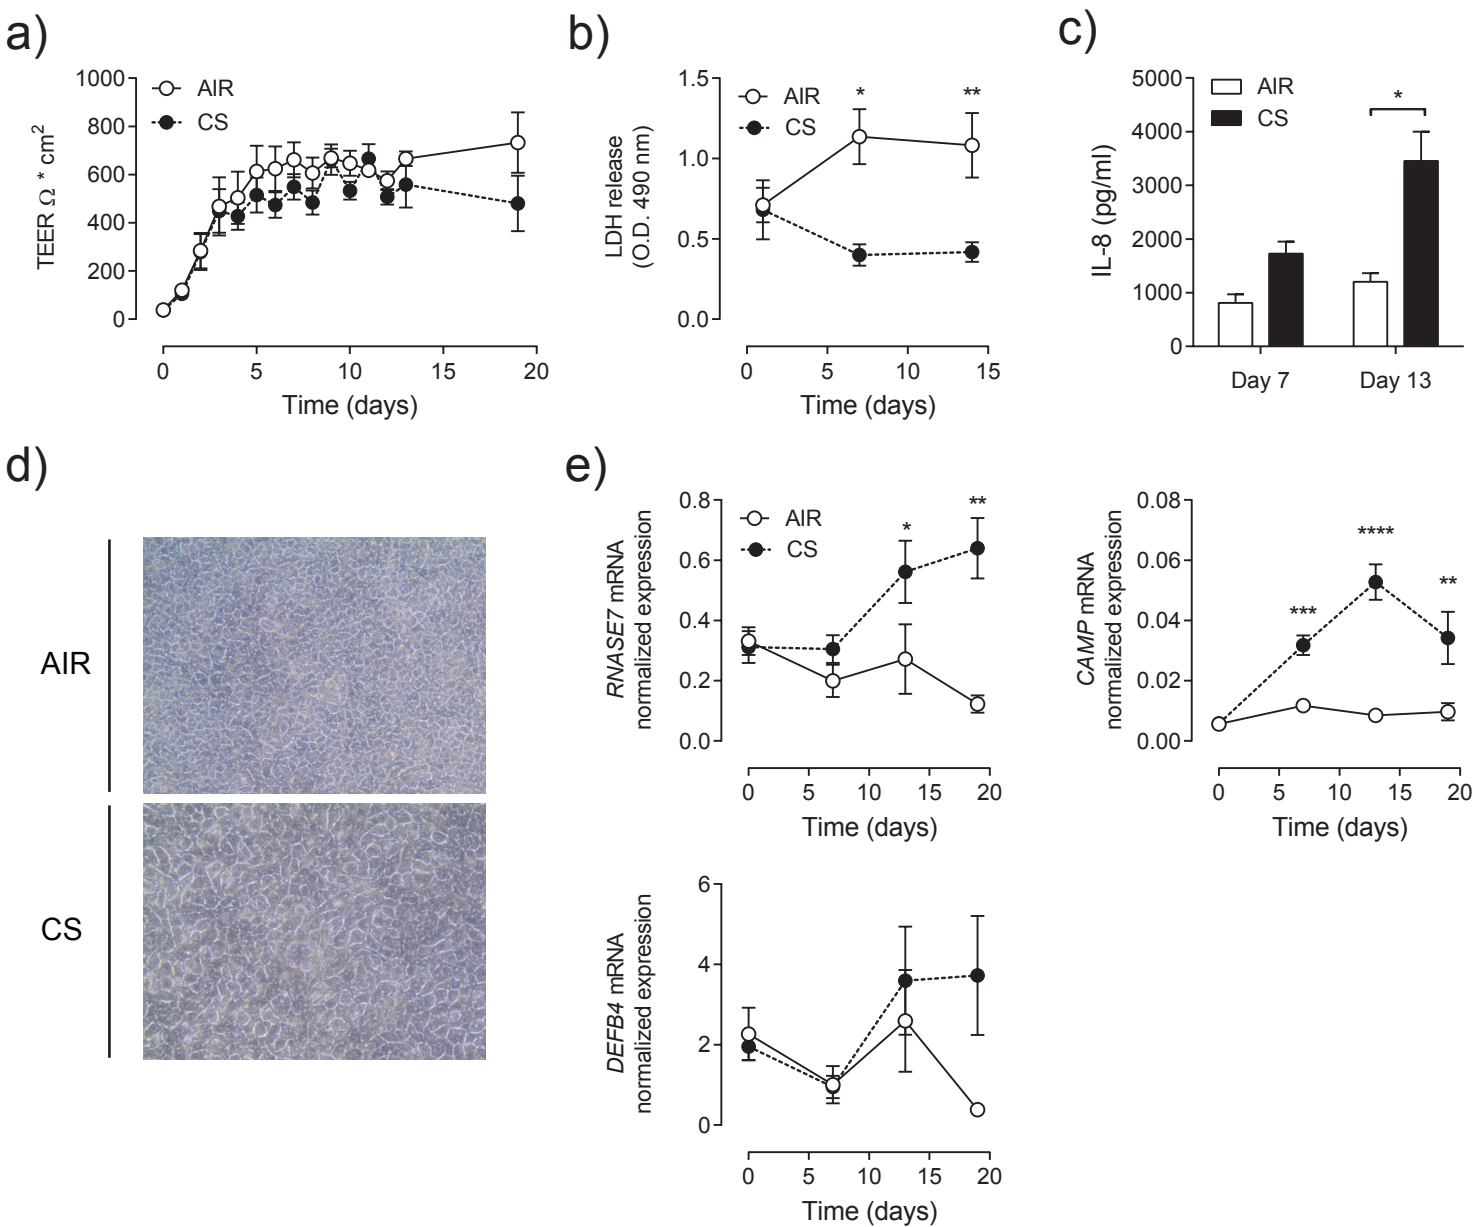

Supplement: inline-supplementary-material-5 [file inline-supplementary-material-5.pdf]
